# Supplementary material for: Long term outcome of complex surgical resection and reconstruction for rare thoracic cancers
Source: PubMed Central journal article supplement — Tumori. 2023 Feb 16;109(5):450–7. doi: 10.1177/03008916231154763 (PMC10540492; doi:10.1177/03008916231154763), 2023-02-16
Supplement: sj-pdf-1-tmj-10.1177_03008916231154763.pdf [file sj-pdf-1-tmj-10.1177_03008916231154763.pdf]

## Supplementary Material

### Complexity score

All procedures were classified in three levels, according to their complexity:

low , intermediate and high.

#### Low complexity score (L):

simple mediastinal resection  
endothoracic lymphadenectomy  
sublobar polmonary resection  
lobectomy / segmentectomy  
pleurectomy and/or decortication  
partial diaphragmatic resection  
partial rib resection.

#### Intermediate complexity score (I):

radical tymectomy  
vascular resection  
left pneumonectomy  
sleeve lobectomy / segmentectomy  
chest-wall resection < 3 ribs  
partial sternectomy  
diaphragmatic reconstruction  
myo-cutaneous flap / omentoplasty

#### High complexity score (H):

extended tymectomy  
esophagectomy  
vascular reconstruction / prosthetic replacement  
right pneumonectomy  
extra-pleural / completion pneumonectomy  
sub-total / total sternectomy  
chest-wall resection  $\geq 3$  ribs with rigid prosthesis  
vertebral resection  
thoraco-pleuro-pneumonectomy

**Table S1.** Number of reconstructions according to tumor type.

|                  | <b>0<br/>reconstruction</b> | <b>1 or 2<br/>reconstructions</b> | <b>≥ 3<br/>reconstructions</b> | <b>TOTAL</b> |
|------------------|-----------------------------|-----------------------------------|--------------------------------|--------------|
| <b>Sarcoma</b>   | 62 (20.9%)                  | 49 (26.5%)                        | 116 (71.6%)                    | 227          |
| <b>Thymoma</b>   | 75 (25.3%)                  | 110 (59.5%)                       | 27 (16.7%)                     | 212          |
| <b>Germ Cell</b> | 160 (53.9%)                 | 26 (14.1%)                        | 19 (11.7%)                     | 205          |
| <b>Total</b>     | 297                         | 185                               | 162                            | 644          |

**Figure S1.** Patients' survival according to the number of reconstructions.

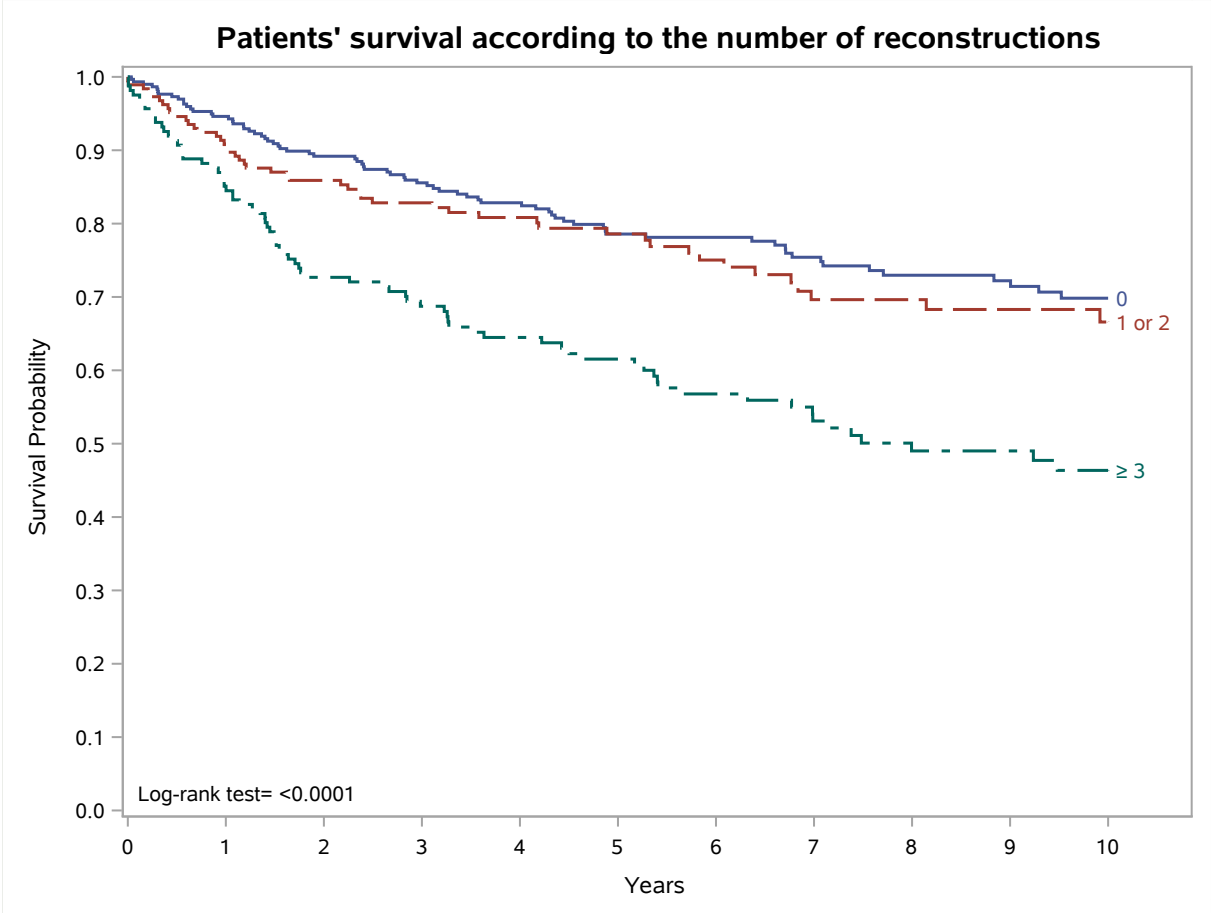

**Figure S2.** Survival of patients with any reconstructions according to tumor type.

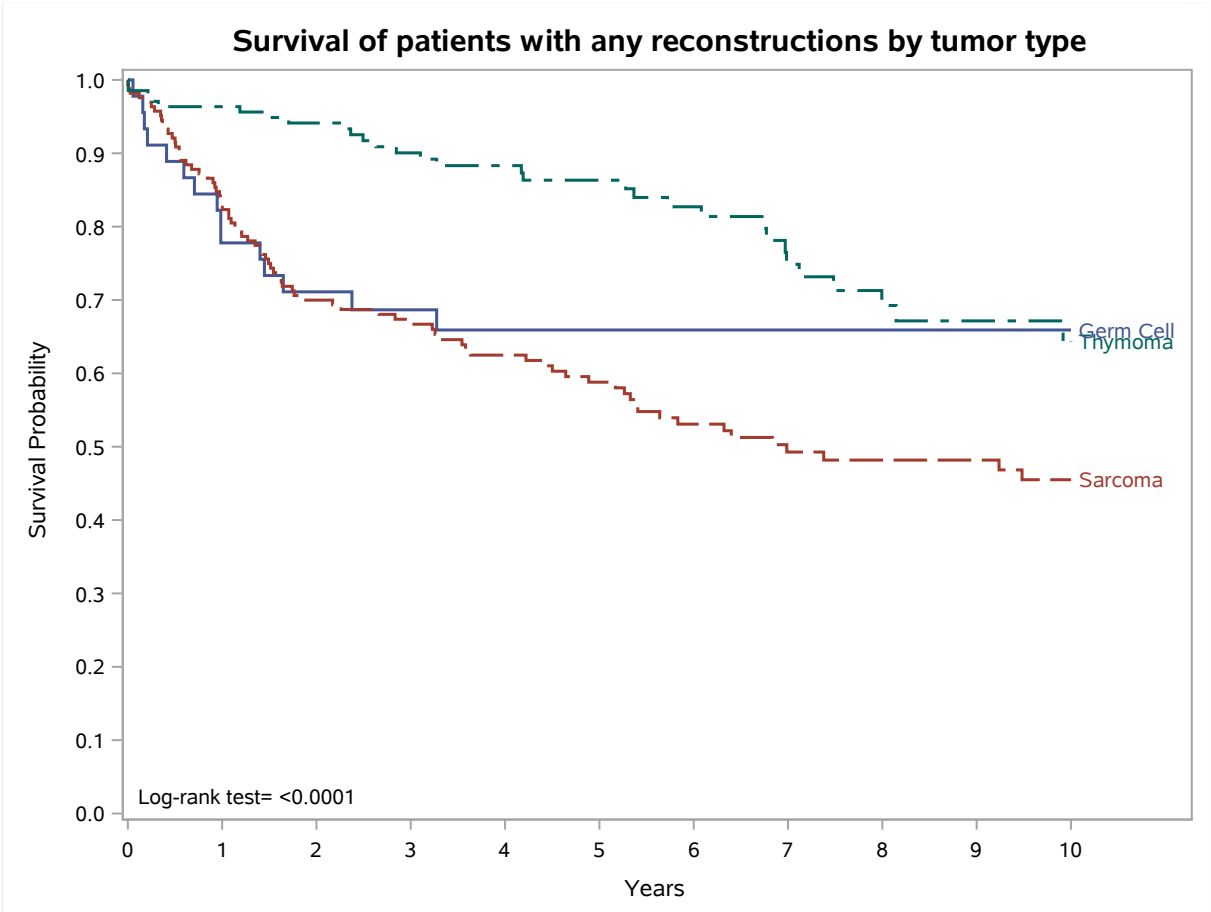

**Table S2:** Multivariate Cox regression models for 30 day and 90 day post-operative mortality: Model A adjusted for age and sex ; Model B adjusted for age, sex and type of tumor.

|                         |               | 30d post-operative mortality<br><i>HR (95%CI)</i><br><i>p-value</i> |                             | 90d post-operative mortality<br><i>HR (95%CI)</i><br><i>p-value</i> |                             |
|-------------------------|---------------|---------------------------------------------------------------------|-----------------------------|---------------------------------------------------------------------|-----------------------------|
|                         |               | Model A                                                             | Model B                     | Model A                                                             | Model B                     |
| <b>Complexity score</b> | <b>L</b>      | Ref.                                                                | Ref.                        | Ref.                                                                | Ref.                        |
|                         | <b>I</b>      | 1.09 (0.08-15.05)<br>0.9472                                         | 0.83 (0.06-11.63)<br>0.8878 | 1.10 (0.19-6.46)<br>0.9135                                          | 1.36 (0.22-8.47)<br>0.7444  |
|                         | <b>H</b>      | 1.50 (0.12-19.23)<br>0.7539                                         | 1.17 (0.09-15.14)<br>0.9052 | 1.39 (0.26-7.39)<br>0.7029                                          | 1.61 (0.29-8.98)<br>0.5845  |
| <b>Reconstructions</b>  | <b>None</b>   | Ref.                                                                | Ref.                        | Ref.                                                                | Ref.                        |
|                         | <b>1 OR 2</b> | 0.85 (0.08-9.52)<br>0.8971                                          | 0.78 (0.07-8.49)<br>0.8363  | 1.07 (0.22-5.30)<br>0.9374                                          | 1.20 (0.23-6.16)<br>0.8256  |
|                         | <b>≥ 3</b>    | 1.75 (0.17-18.26)<br>0.6386                                         | 1.92 (0.17-21.70)<br>0.5970 | 1.62 (0.31-8.36)<br>0.5662                                          | 1.84 (0.33-10.33)<br>0.4885 |

The results of multivariate Cox models did not show a statistically significant impact of complexity score and number of reconstructions 30-day and 90-day post-operative mortality even after adjustment for age, sex and tumor type.

**Table S3.** Long-term survival of germ cell tumors and thymomas, stratified by complexity score and primary vs. metastatic site.

|                  |                           | N patients        | 5-year Cumulative survival | Log-Rank P-value | 10-year cumulative survival | Log-Rank P-value |        |
|------------------|---------------------------|-------------------|----------------------------|------------------|-----------------------------|------------------|--------|
| <b>Germ Cell</b> | <b>Primary</b>            | 65                | 75%                        | 0.5868           | 73%                         | 0.8168           |        |
|                  | <b>Metastatic</b>         | 140               | 76%                        |                  | 71%                         |                  |        |
|                  | <b>Complexity score L</b> | <b>Primary</b>    | 11                         | 89%              | 0.4602                      | 71%              | 0.7901 |
|                  |                           | <b>Metastatic</b> | 132                        | 79%              |                             | 74%              |        |
|                  | <b>Complexity score I</b> | <b>Primary</b>    | 6                          | 67%              | 0.0942                      | 67%              | 0.0942 |
|                  |                           | <b>Metastatic</b> | 3                          | 0%               |                             | 0%               |        |
|                  | <b>Complexity score H</b> | <b>Primary</b>    | 48                         | 72%              | 0.0829                      | 72%              | 0.0829 |
|                  |                           | <b>Metastatic</b> | 5                          | 40%              |                             | 40%              |        |

|                |                           | N patients        | 5-year Cumulative survival | Log-Rank P-value | 10-year cumulative survival | Log-Rank P-value |        |
|----------------|---------------------------|-------------------|----------------------------|------------------|-----------------------------|------------------|--------|
| <b>Thymoma</b> | <b>Primary</b>            | 195               | 87%                        | 0.0501           | 65%                         | 0.0700           |        |
|                | <b>Metastatic</b>         | 17                | 63%                        |                  | 52%                         |                  |        |
|                | <b>Complexity score L</b> | <b>Primary</b>    | 20                         | 90%              | 0.1652                      | 72%              | 0.2828 |
|                |                           | <b>Metastatic</b> | 12                         | 60%              |                             | 60%              |        |
|                | <b>Complexity score I</b> | <b>Primary</b>    | 46                         | 90%              | 0.0744                      | 66%              | 0.0744 |
|                |                           | <b>Metastatic</b> | 4                          | 50%              |                             | 50%              |        |
|                | <b>Complexity score H</b> | <b>Primary</b>    | 129                        | 85%              | 0.6880                      | 64%              | 0.0585 |
|                |                           | <b>Metastatic</b> | 1                          | 100%             |                             | 0%               |        |

**Figure S3.** Survival of patients according to primary vs. metastatic disease with germ cell (A) or thymomas (B).

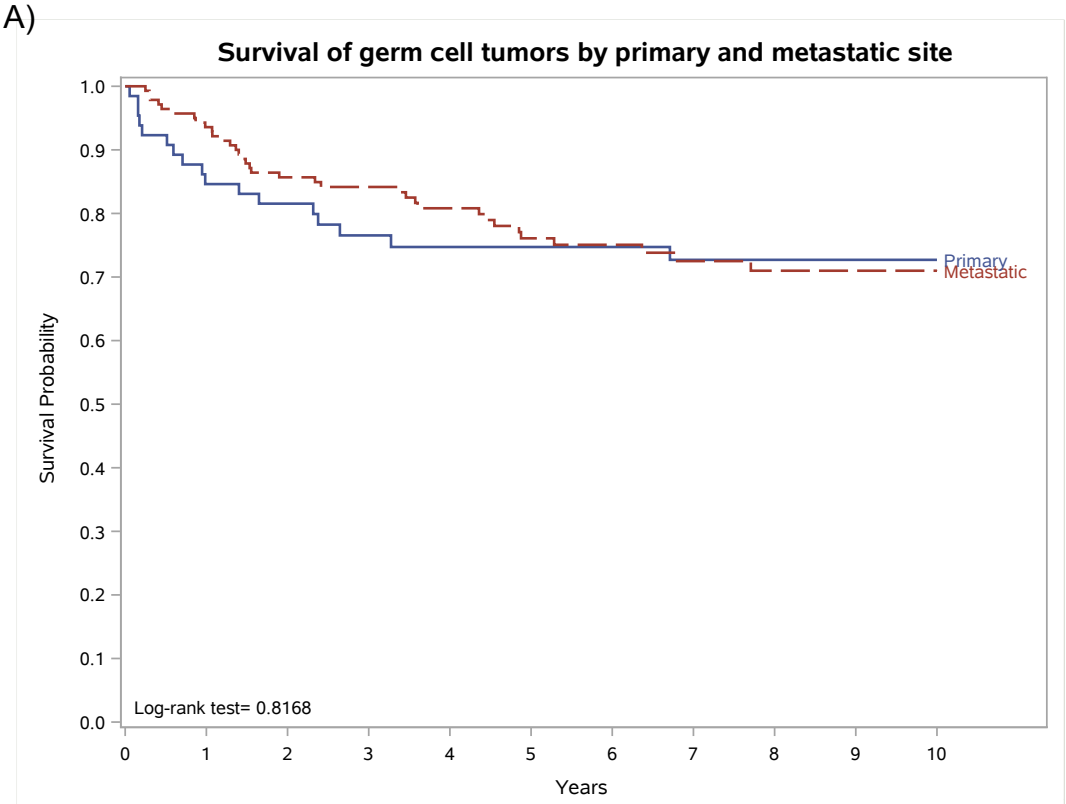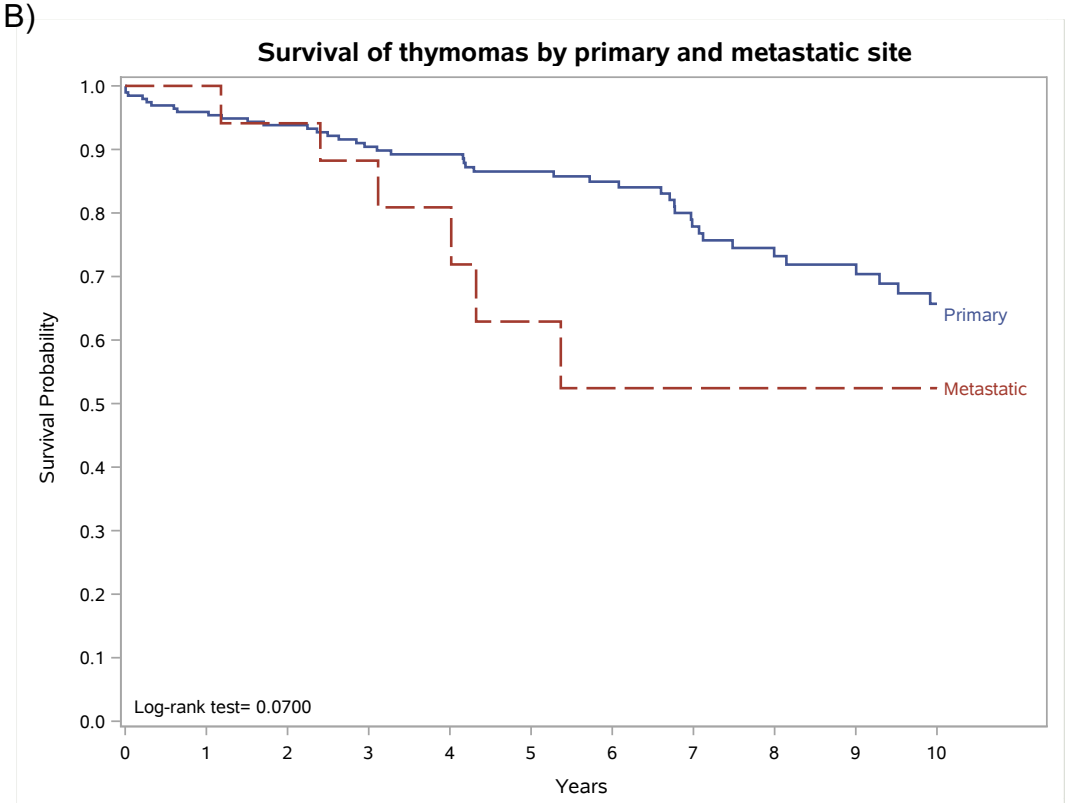

**Table S4:** Multivariate Cox regression models for 5-year and 10-year mortality: Model A adjusted for age and sex ; Model B adjusted for age, sex and type of tumor.

|                         | 5-year survival            |                                          | 10-year survival           |                                          |
|-------------------------|----------------------------|------------------------------------------|----------------------------|------------------------------------------|
|                         | HR (95%CI)                 |                                          | HR (95%CI)                 |                                          |
|                         | p-value                    |                                          | p-value                    |                                          |
|                         | Model A                    | Model B                                  | Model A                    | Model B                                  |
| <b>Complexity score</b> |                            |                                          |                            |                                          |
| <b>L</b>                | Ref.                       | Ref.                                     | Ref.                       | Ref.                                     |
| <b>I</b>                | 0.96 (0.56-1.65)<br>0.8854 | 1.39 (0.79-2.45)<br>0.2583               | 0.97 (0.61-1.55)<br>0.8954 | 1.20 (0.73-1.96)<br>0.4705               |
| <b>H</b>                | 1.48 (0.89-2.47)<br>0.1356 | <b>2.08 (1.23-3.52)</b><br><b>0.0064</b> | 1.40 (0.89-2.20)<br>0.1479 | <b>1.72 (1.08-2.75)</b><br><b>0.0225</b> |
| <b>Reconstructions</b>  |                            |                                          |                            |                                          |
| <b>None</b>             | Ref.                       | Ref.                                     | Ref.                       | Ref.                                     |
| <b>1 OR 2</b>           | 0.66 (0.40-1.10)<br>0.1130 | 0.77 (0.46-1.29)<br>0.3168               | 0.76 (0.48-1.19)<br>0.2236 | 0.82 (0.52-1.29)<br>0.3816               |
| <b>≥ 3</b>              | 1.17 (0.71-1.94)<br>0.5436 | 0.89 (0.52-1.50)<br>0.6569               | 1.34 (0.86-2.09)<br>0.1960 | 1.05 (0.66-1.67)<br>0.8409               |

The results of age and sex adjusted multivariate Cox models (Table S4) showed a nonsignificant impact of complexity score and number of reconstructions on 5-year survival (Model A). After the further adjustment for tumor type, the high complexity score had a significantly poorer 5-year survival compared to low score (HR=2.08, p=0.0064, Model B). A similar risk profile was observed for 10-year survival (high complexity score HR=1.72, p=0.0225, Model B).
